# Supplementary material for: Hippocampal aggregation signatures of pathogenic UBQLN2 in amyotrophic lateral sclerosis and frontotemporal dementia
Source: PubMed Central journal article supplement — Brain. 2024 May 4;147(10):3547–61. doi: 10.1093/brain/awae140 (PMC11449146; doi:10.1093/brain/awae140), 2024-05-04
Supplement: awae140_supplementary_data.pdf [file awae140_supplementary_data.pdf]

# Hippocampal aggregation signatures of pathogenic *UBQLN2* in amyotrophic lateral sclerosis and frontotemporal dementia

## Supplementary methods, tables, and figures

Kyrah M. Thumbadoo,<sup>1,2</sup> Birger V. Dieriks,<sup>2,3</sup> Helen C. Murray,<sup>2,3</sup> Molly E. V. Swanson,<sup>1,3</sup> Ji Hun Yoo,<sup>2,4</sup> Nasim F. Mehrabi,<sup>2,3</sup> Clinton Turner,<sup>2,3,5</sup> Michael Dragunow,<sup>2,4</sup> Richard L.M. Faull,<sup>2,3</sup> Maurice A. Curtis,<sup>2,3</sup> Teepu Siddique,<sup>6</sup> Christopher E Shaw,<sup>2,7</sup> Kathy L Newell,<sup>8</sup> Lyndal Henden,<sup>9</sup> Kelly L. Williams,<sup>9</sup> Garth A. Nicholson,<sup>9,10,11,12</sup> and Emma L. Scotter<sup>1,2</sup>

- 1 School of Biological Sciences, University of Auckland, Auckland, New Zealand
- 2 Centre for Brain Research, University of Auckland, Auckland, New Zealand
- 3 Department of Anatomy and Medical Imaging, University of Auckland, Auckland, New Zealand
- 4 Department of Pharmacology and Clinical Pharmacology, University of Auckland, Auckland, New Zealand
- 5 Department of Anatomical Pathology, LabPlus, Auckland City Hospital, Auckland, New Zealand
- 6 Departments of Neurology, Cell and Developmental Biology and Pathology, Northwestern University Feinberg School of Medicine, Chicago, USA
- 7 UK Dementia Research Institute Centre, Institute of Psychiatry, Psychology and Neuroscience, King's College London, United Kingdom
- 8 Department of Pathology & Laboratory Medicine, Indiana University School of Medicine, Indianapolis, IN, USA
- 9 Macquarie University Centre for Motor Neuron Disease Research, Macquarie Medical School, Faculty of Medicine, Health and Human Sciences, Macquarie University, Sydney, New South Wales, Australia
- 10 Northcott Neuroscience Laboratory, Australian and New Zealand Army Corps (ANZAC) Research Institute, Concord, New South Wales, Australia
- 11 Faculty of Medicine, University of Sydney, Sydney, New South Wales, Australia
- 12 Molecular Medicine Laboratory, Concord Repatriation General Hospital, Concord, New South Wales, Australia

## Supplementary methods

Clinical information for *UBQLN2* variant cases

### **MNI7 – T487I**

Reproduced from Williams *et al.*<sup>1</sup>: “Diagnosis of ALS was at 58 years in this patient. Due to the strong family history of ALS, she suspected she might have been affected when her left hand began to waste and she could not carry objects. She also had had a “croaky” voice for 6 years. Initial examination of the patient by a neurologist showed hoarse speech, can’t rapidly repeat “cc”, heel to toe walking unsteady, and she could not heel walk. Both hands were wasted, with more wasting in the left hand. She could not oppose her thumb and finger, and wrist extension is 3/5. She had increased jaw jerk, generalised hyper reflexia, plantars flexor and increased tone in her lower limbs. She had no fasciculations and her sensory was normal. A frontotemporal dementia test conducted 12 months after her ALS diagnosis showed no frontotemporal impairment. Three years after diagnosis, her voice had gotten more hoarse and she could no longer elevate her left arm. Her legs were stiff but she had no footdrop, she had increased tone in her legs and hyperreflexia. Nerve conduction studies showed decreased motor amplitudes and prolonged distal latencies. An EMG showed chronic neurogenic changes in upper limb which were predominantly distal with fibrillation, and only showed minimal lower limb changes. She is still alive 3 years after diagnosis.” The patient subsequently died at age 61.

### **V:7 – T487I**

The patient had a complex neuropsychiatric history prior to diagnosis at age 37 of ALS with personality and behavioural changes. His presenting complaint at age 30 was speech symptoms. He did not engage with neurology services and died at age 39.

### **P497H**

The patient first presented with respiratory symptoms at age 46 (reported as age 41 in Deng *et al.*<sup>2</sup> but amended here) and was diagnosed with ALS. She lived another 72 months, having gone on invasive ventilation 36 months after onset.

### **P506S**

Reproduced from Gkazi *et al.*<sup>3</sup>: The patient “was diagnosed with FTD at age 54 years with gradual behavioral and personality changes over a period of 2 years. A year after her initial diagnosis, she clearly showed signs of ALS with muscle wasting, fasciculation, and exaggerated reflexes in the cranial nerve, upper limb territories, and lower limbs alone being the first symptoms. The duration of disease was 3 years.”

### **S222G**

The patient was noted as having mild cognitive impairment at age 88 in the context of an Alzheimer’s Disease (AD) research study. He developed sudden onset confusion after a heart attack at age 90 and was diagnosed with probable AD. Prior to this, his family reported a history of slowness of speech and understanding, and apathy. In his last year of life, he was incontinent and wheelchair bound. He died at age 93 and subsequent neuropathological analysis excluded Alzheimer’s disease, finding instead progressive supranuclear palsy (PSP).

### **II:3 – P497L**

Modified from Fahed *et al.*<sup>4</sup>: The patient first presented with left lower extremity weakness at 63 years of age. Over the course of disease, her clinical features involved dysarthria, dysphagia, and diffuse muscle weakness. The patient did not present with stiffness, involuntary movements, or dementia until her death at 67 years.

### **III:3 – P497L**

Modified from Fahed *et al.*<sup>4</sup>: The patient presented with slurred speech at 20 years of age. Spastic paralysis in all extremities, dysarthria, dysphagia, spastic gait, and behavioural dementia were noted as clinical features throughout her disease. The duration of disease was 17 years.

### **IV:2 – P497L**

Modified from Fahed *et al.*<sup>4</sup>: The patient presented with dysarthria at 20 years of age. Spastic paralysis in all extremities, dysarthria, dysphagia, spastic gait, and behavioural dementia were noted as clinical features. She died at age 24, 4 years after symptom onset.

### Supplementary Table 1 FALS 5 and FALS 14 relatedness analysis sample information

| Family ID | Pedigree ID | Sex    | Disease Status | UBQLN2 p.T487I |
|-----------|-------------|--------|----------------|----------------|
| FALS5     | III:8       | Female | Affected       | Yes            |
| FALS5     | IV:9        | Female | Affected       | Yes            |
| FALS5     | IV:18       | Female | Affected       | Yes            |
| FALS14    | II:1        | Female | Unaffected     | No             |
| FALS14    | III:2       | Female | Affected       | Yes            |

**Supplementary Table 2 Demographics and clinical features of study cohort**

| Case type                               | Case code             | Diagnosis      | Sex     | Genetic mutation                      | AAO (y)                               | AAD (y) | Site of Onset          | Brain weight (g) | PMD (h) |
|-----------------------------------------|-----------------------|----------------|---------|---------------------------------------|---------------------------------------|---------|------------------------|------------------|---------|
| <b>Control</b>                          | H211                  | NNDC           | M       | N/A                                   | N/A                                   | 41      | N/A                    | 1513             | 8       |
|                                         | H215                  | NNDC           | F       | N/A                                   | N/A                                   | 67      | N/A                    | 1232             | 23.5    |
|                                         | H230                  | NNDC           | F       | N/A                                   | N/A                                   | 57      | N/A                    | 1243             | 32      |
|                                         | H238                  | NNDC           | F       | N/A                                   | N/A                                   | 63      | N/A                    | 1323.5           | 16      |
|                                         | H239                  | NNDC           | M       | N/A                                   | N/A                                   | 64      | N/A                    | 1529.1           | 15.5    |
|                                         | H247                  | NNDC           | M       | N/A                                   | N/A                                   | 51      | N/A                    | 1671             | 31      |
| <b>Sporadic ALS</b>                     | MN4                   | MND-ALS        | M       | None found <sup>a</sup>               | 39                                    | 41      | Bulbar                 | 1485             | 7       |
|                                         | MN5                   | MND-ALS        | F       | None found <sup>a</sup>               | 54                                    | 55      | Bulbar                 | 1296             | 5       |
|                                         | MN6                   | MND-ALS        | M       | None found <sup>a</sup>               | 53                                    | 58      | Spinal                 | 1289             | 8.5     |
|                                         | MN8                   | MND-ALS        | M       | None found <sup>a</sup>               | 83                                    | 84      | Spinal                 | 1252             | 3       |
|                                         | MN9                   | MND-ALS        | M       | None found <sup>a</sup>               | 87                                    | 88      | Spinal                 | 1241             | 36      |
|                                         | MN10                  | MND-ALS        | M       | None found <sup>a</sup>               | 42                                    | 46      | Spinal – LL            | -                | 9       |
|                                         | MN12                  | MND-ALS        | M       | None found <sup>a</sup>               | 46                                    | 49      | Respiratory            | 1433.4           | 34      |
|                                         | MN13                  | MND-ALS        | M       | None found <sup>a</sup>               | 55                                    | 55      | Spinal – UL            | 1384             | 10      |
|                                         | MN15                  | MND-ALS+FTD    | F       | None found <sup>a</sup>               | 52                                    | 54      | -                      | -                | 18      |
|                                         | MN16                  | MND-ALS        | M       | None found <sup>a</sup>               | 63                                    | 69      | Spinal – UL            | 1387.2           | 16.5    |
|                                         | MN19                  | MND-ALS        | M       | None found <sup>a</sup>               | 72                                    | 75      | Spinal – LL            | -                | 20.5    |
|                                         | MN20                  | MND-ALS        | M       | None found <sup>a</sup>               | -                                     | 85      | Spinal – LL            | 1328.9           | 15      |
|                                         | MN22                  | MND-ALS        | F       | ND                                    | 58                                    | 65      | Spinal – UL            | 1137.6           | 9       |
|                                         | MN25                  | MND-ALS        | M       | ND                                    | -                                     | 71      | -                      | -                | 23.5    |
|                                         | MN26                  | MND-ALS        | M       | ND                                    | 75                                    | 77      | Spinal – UL            | 1183             | 3       |
|                                         | MN27                  | MND-ALS+LBD-bs | F       | ND                                    | 86                                    | 87      | -                      | -                | -       |
| MN29                                    | MND-ALS               | M              | ND      | -                                     | 72                                    | -       | 1610.9                 | 24               |         |
| MN30                                    | MND-ALS               | F              | ND      | 83                                    | 84                                    | Bulbar  | 1227                   | 17.5             |         |
| MN31                                    | MND-ALS               | F              | ND      | 58                                    | 58                                    | -       | 1251                   | 19               |         |
| MN32                                    | MND-ALS               | M              | ND      | 57                                    | 59                                    | -       | 1657.7                 | 6                |         |
| <b>Familial ALS of unknown genotype</b> | MN11                  | MND-ALS        | F       | None found <sup>a</sup>               | -                                     | 77      | Spinal – LL            | 1206             | 18      |
|                                         | MN14                  | Probable-ALS   | F       | None found <sup>a</sup>               | 57                                    | 59      | Bulbar                 | 1180.2           | 19      |
|                                         | MN21                  | MND-ALS        | F       | None found <sup>a</sup>               | 56                                    | 59      | Spinal – LL            | -                | 17.5    |
| <b>SOD1-linked</b>                      | MN24                  | MND-ALS        | F       | <i>SOD1</i> p.E101G                   | -                                     | 54      | -                      | 1328             | -       |
| <b>FUS-linked</b>                       | BBN_10244             | MND-ALS        | F       | <i>FUS</i> p.P525L                    | 22.3                                  | 23      | Spinal                 | -                | 37      |
|                                         | BBN_16359             | PSP            | M       | <i>UBQLN2</i> p.S222G                 | -                                     | 93      | -                      | -                | 19.5    |
|                                         | MN17 – T487I          | MND-ALS+FTD    | F       | <i>UBQLN2</i> p.T487I                 | 58                                    | 61      | Spinal                 | -                | 69      |
|                                         | V:7 – T487I           | MND-ALS+FTD    | M       | <i>UBQLN2</i> p.T487I                 | 30                                    | 39      | -                      | -                | 25.5    |
|                                         | P497H                 | ALS            | F       | <i>UBQLN2</i> p.P497H                 | 46                                    | 57      | Respiratory            | -                | -       |
|                                         | II:3 – P497L          | ALS            | F       | <i>UBQLN2</i> p.P497L                 | 63                                    | 67      | Spinal – LL            | -                | -       |
|                                         | III:3 – P497L         | ALS+FTD        | F       | <i>UBQLN2</i> p.P497L                 | 20                                    | 37      | Bulbar                 | -                | -       |
|                                         | IV:2 – P497L          | ALS+FTD        | F       | <i>UBQLN2</i> p.P497L                 | 20                                    | 24      | Bulbar                 | -                | -       |
|                                         | BBN_15292             | MND-ALS+FTD    | F       | <i>UBQLN2</i> p.P506S                 | 54                                    | 56      | Cognitive              | -                | 35      |
|                                         | <b>C9orf72-linked</b> | MN2            | MND-ALS | F                                     | <i>C9orf72</i> expansion <sup>b</sup> | 52      | 53                     | Spinal           | -       |
| MN18                                    |                       | MND-ALS        | F       | <i>C9orf72</i> expansion <sup>c</sup> | 47                                    | 53      | Spinal – LL            | 1269             | 12      |
| MN23                                    |                       | MND-ALS        | F       | <i>C9orf72</i> expansion <sup>d</sup> | 77                                    | 79      | Spinal – LL            | 1232             | 27      |
| MN28                                    |                       | MND-ALS        | F       | <i>C9orf72</i> expansion <sup>e</sup> | 50                                    | 62      | Bulbar and Spinal – UL | 1127             | 14      |
| MN33                                    |                       | MND-ALS        | M       | <i>C9orf72</i> expansion <sup>d</sup> | 63                                    | 65      | Spinal – LL            | 1304             | 46      |

<sup>a</sup> No mutations detected in *C9orf72*, *TARDBP*, *FUS*, or *SOD1*, as previously described in Scotter *et al.*<sup>5</sup>.

<sup>b</sup> Obligate carrier, affected offspring genotyped.

<sup>c</sup> Genotyped in Scotter *et al.*<sup>5</sup>.

<sup>d</sup> Genotyped during life.

<sup>e</sup> Genotype inferred from neuropathology.

Cases MN17 – T487I, V:7 – T487I, P497H, and P506S were previously published in references <sup>1</sup>, <sup>2</sup>, and <sup>3</sup>, respectively. Cases II:3 – P497L, III:3 – P497L, and IV:2 – P497L were previously published in reference <sup>4</sup>. Abbreviations: -, unknown; AAD, age at death; AAO, age at

onset; LBD-bs, LL, lower limb; Lewy body disease- brainstem predominant; N/A, not applicable; ND, not done; NNDC, non-neurologically diseased control; PMD, post-mortem delay; PSP, progressive supranuclear palsy; UL, upper limb.

### Supplementary Table 3 Primary antibodies

| Primary antibody                                                            | Species (isotype)      | Manufacturer             | Catalogue #         | RRID       | Clonality  | Dilution |
|-----------------------------------------------------------------------------|------------------------|--------------------------|---------------------|------------|------------|----------|
| <b>Multiplex Fluorescent Immunohistochemistry panel</b>                     |                        |                          |                     |            |            |          |
| C9RANT (PolyGA)                                                             | Mouse (IgG1 $\kappa$ ) | Merck Millipore          | MABN889             | AB_2728663 | Monoclonal | 1:2000   |
| Ubiquilin 2                                                                 | Mouse (IgG2a)          | Santa Cruz Biotechnology | SC-100612           | AB_2272422 | Monoclonal | 1:1000   |
| C9RANT (PolyGP)                                                             | Rabbit (IgG)           | Novus Biologicals        | NBP2-25018          | AB_2893239 | Polyclonal | 1:3000   |
| pTDP-43 (Ser409/410)                                                        | Rat (IgG2a)            | BioLegend                | BL829901, Clone ID3 | AB_2564934 | Monoclonal | 1:3000   |
| p62                                                                         | Guinea Pig (IgG)       | Progen                   | GP62-C              | AB_2687531 | Polyclonal | 1:500    |
| <b>Double-label Fluorescent Immunohistochemistry for STED imaging panel</b> |                        |                          |                     |            |            |          |
| C9RANT (PolyGA)                                                             | Mouse (IgG1 $\kappa$ ) | Merck Millipore          | MABN889             | AB_2728663 | Monoclonal | 1:2000   |
| Ubiquilin 2                                                                 | Mouse (IgG2a)          | Santa Cruz Biotechnology | SC-100612           | AB_2272422 | Monoclonal | 1:1000   |

Abbreviations: RRID, Research resource identifier; pTDP-43, phosphorylated (Ser409/410) TDP-43.

**Supplementary Table 4 Secondary antibodies and stains**

| <b>Secondary antibody</b>                                                   | <b>Conjugate</b>         | <b>Manufacturer</b>      | <b>Catalogue #</b> | <b>RRID</b> | <b>Clonality</b> | <b>Dilution</b> |
|-----------------------------------------------------------------------------|--------------------------|--------------------------|--------------------|-------------|------------------|-----------------|
| <b>Multiplex Fluorescent Immunohistochemistry panel</b>                     |                          |                          |                    |             |                  |                 |
| Goat anti-mouse IgG1k                                                       | Alexa Fluor® 488         | Thermo Fisher Scientific | A-21121            | AB_2535764  | Monoclonal       | 1:500           |
| Goat anti-mouse IgG2a                                                       | Alexa Fluor® 594         | Thermo Fisher Scientific | A-21135            | AB_2535774  | Monoclonal       | 1:500           |
| Goat anti-rabbit IgG                                                        | IRDye 800CW              | LI-COR Biosciences       | 926-32211          | AB_2651127  | Polyclonal       | 1:500           |
| Goat anti-rat IgG2a                                                         | Alexa Fluor® 546         | Thermo Fisher Scientific | A-11081            | AB_141738   | Polyclonal       | 1:500           |
| Goat anti-guinea pig IgG                                                    | Alexa Fluor® 647         | Thermo Fisher Scientific | A-21450            | AB_141882   | Polyclonal       | 1:500           |
| <b>Stain</b>                                                                | <b>Species (isotype)</b> | <b>Company</b>           | <b>Catalogue #</b> | <b>RRID</b> | <b>Clonality</b> | <b>Dilution</b> |
| Hoechst 33342 nuclear stain                                                 | -                        | Thermo Fisher Scientific | H3750              |             | -                | 1:2000          |
| <b>Double-label Fluorescent Immunohistochemistry for STED imaging panel</b> |                          |                          |                    |             |                  |                 |
| Goat anti-mouse IgG1k                                                       | Biotin                   | Thermo Fisher Scientific | A10519             | AB_1500809  | Monoclonal       | 1:500           |
| Abberior Star Red                                                           | Neutravidin              | Abberior                 | STRED-0121         |             | -                | 1:500           |
| Goat anti-mouse IgG2a                                                       | Alexa Fluor® 594         | Thermo Fisher Scientific | A-21135            | AB_2535774  | Monoclonal       | 1:500           |

Abbreviations: RRID, Research resource identifier; pTDP-43, phosphorylated (Ser409/410) TDP-43.



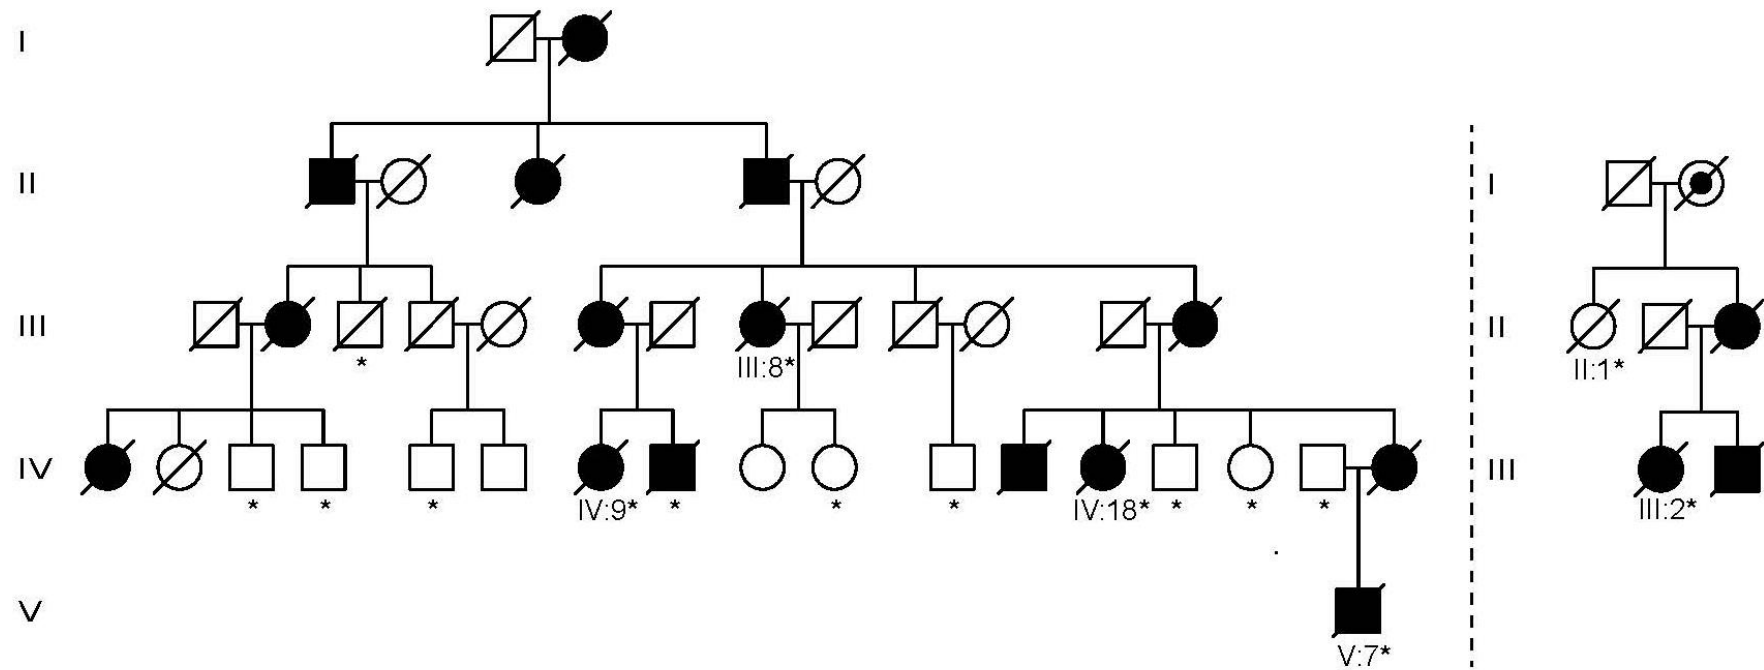

**Supplementary Figure 1 Pedigrees of families FALS5 and FALS14.** Pedigrees of family FALS5 (left) and FALS14 (right) showing segregation of the *UBQLN2* c.1460C>T (p.T487I) mutation. DNA from individuals III:8, IV:9, and IV:18 from FALS5; and individuals II:1 and III:2 from FALS14 were analysed for identity-by-descent. Brain tissue from individuals IV:18 and V:7 from FALS5 was analysed for neuropathology. Filled symbols, affected by ALS and/or FTD; Open symbols, unaffected; Asterisks, genotyped for *UBQLN2* p.T487I. Original pedigrees were published in <sup>1</sup>.

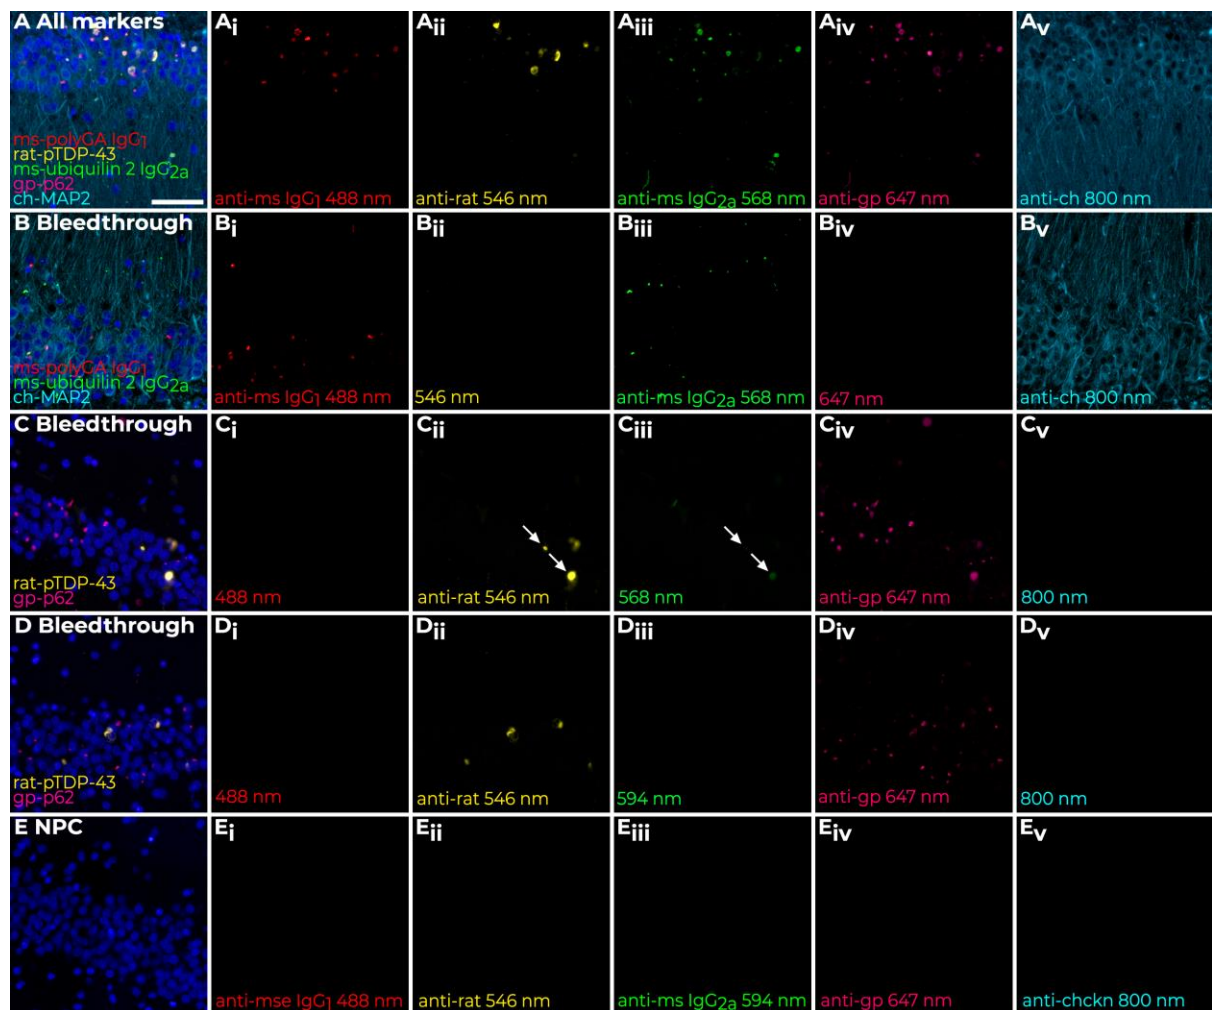

**Supplementary Figure 2 Multiplex immunohistochemistry secondary antibody bleed-through, bleed-back, and secondary-only controls.** Aggregate staining was first optimised in *C9orf72*-linked ALS case MN28, as it was immunopositive for all markers (**A-A<sub>v</sub>**). DPR protein polyGA staining in the 488 nm channel (**B<sub>i</sub>**) demonstrated no bleed-through into the next channel, 546 nm (**B<sub>ii</sub>**). Additionally, ubiquilin 2 staining in 568 nm (**B<sub>3</sub>**) showed no bleed-back into 546 nm (**B<sub>ii</sub>**), nor bleed-through into the 647 nm channel (**B<sub>iv</sub>**). pTDP-43 staining in the 546 nm channel (**C<sub>ii</sub>**) showed trace amounts of bleed-through into the 568 nm channel (**C<sub>iii</sub>**, white arrowheads). As a result, a 594 nm secondary antibody was used to detect ubiquilin 2 instead and when imaged, showed no bleed-through of pTDP-43 (**D<sub>iii</sub>**). Secondary antibodies were specific to primary antibodies directed against polyGA, pTDP-43, ubiquilin 2, p62, and MAP2 as no staining was observed when primary antibodies were omitted (**E-E<sub>v</sub>**). Scale bar for all images, 50  $\mu$ m.

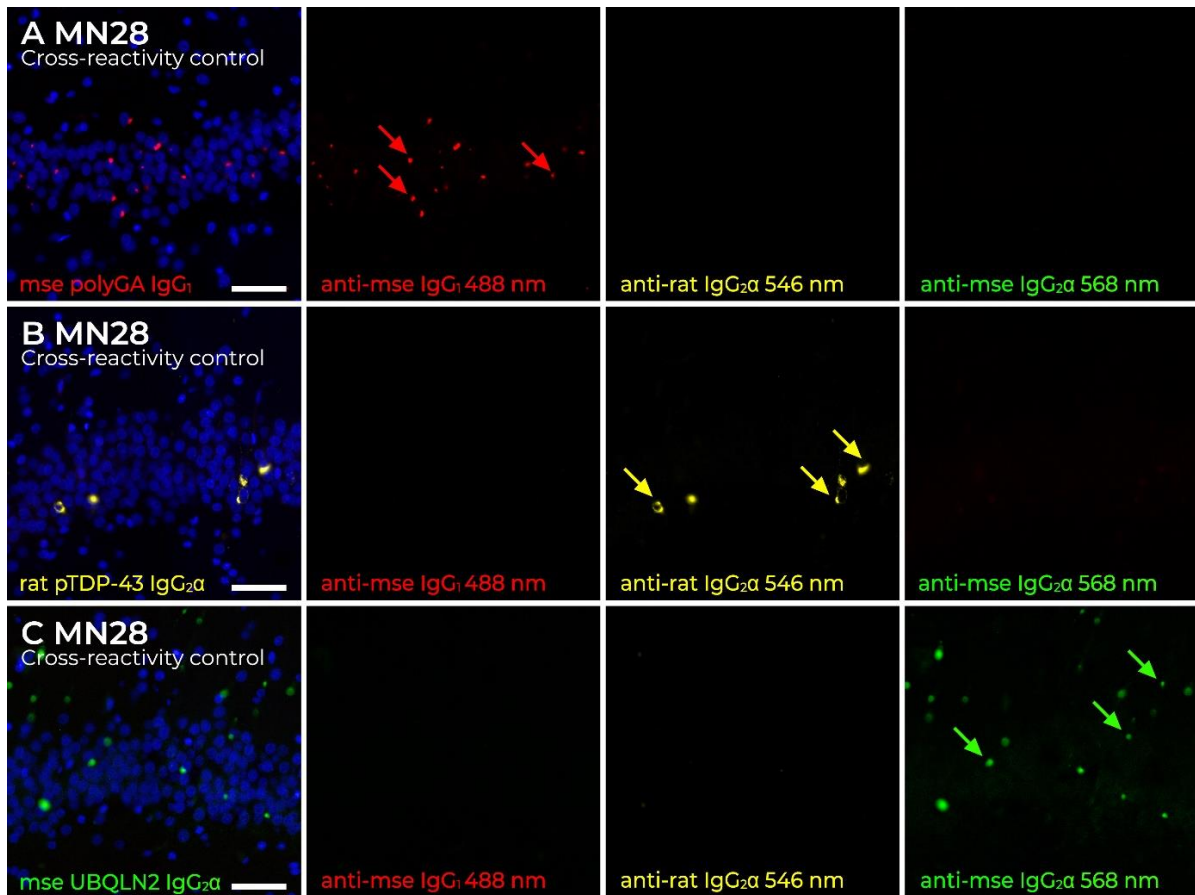

**Supplementary Figure 3 Multiplex immunohistochemistry secondary antibody cross-reactivity controls.** Aggregate staining was first optimised in *C9orf72*-linked ALS case MN28, as it stains for all markers. DPR protein polyGA staining using a mouse IgG1 $\kappa$  primary (**A**, red arrows) was not detected by secondaries against rat IgG2 $\alpha$  (546 nm) or mouse IgG2 $\alpha$  (568 nm) when all secondaries were added. Additionally, pTDP-43 staining using a rat IgG2 $\alpha$  primary (**B**, yellow arrows) was not detected by secondaries against mouse IgG1 (488 nm) or IgG2 $\alpha$  (568 nm). Finally, a mouse IgG2 $\alpha$  secondary (568 nm) specifically detected ubiquilin 2 aggregates stained using a mouse IgG2 $\alpha$  primary (**C**, green arrows), as no staining was observed in the 488 nm or 546 nm channels. Note: In the final immunohistochemical runs for all cohort cases, a mouse IgG2 $\alpha$  594 nm secondary was used to visualise ubiquilin 2 staining. The 568 nm secondary antibody shown in this optimisation and the 594 nm secondary antibody are equivalent as per manufacturer's information, but with different conjugated fluorophores. Scale bar for all images, 50  $\mu$ m.

## Sporadic ALS

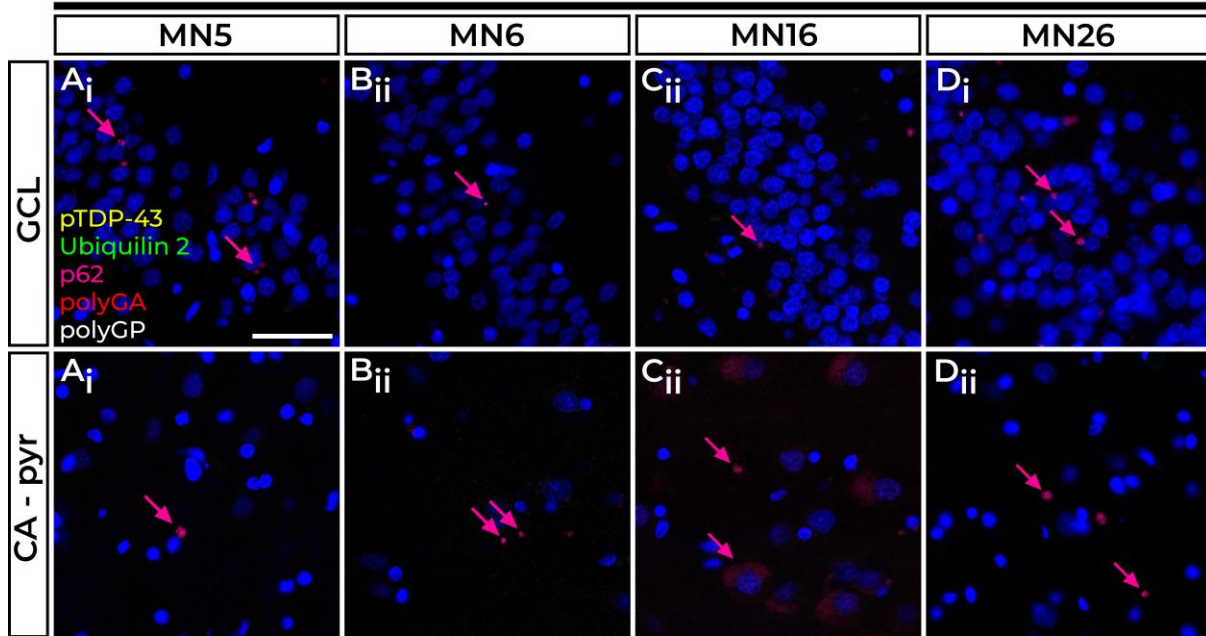

**Supplementary Figure I P62 pathology in the hippocampal dentate gyrus and cornu ammonis regions of sporadic ALS cases.** Punctate p62-positive inclusions were found in the GCL (**A<sub>i</sub>-D<sub>i</sub>**), and CA-pyr layers (**A<sub>ii</sub>-D<sub>ii</sub>**) in MN5, MN6, MN16, and MN26, all ALS cases of unknown genotypic cause. No hippocampal ubiquilin 2, pTDP-43, or DPR (polyGA and polyGP) protein pathology was observed in any of these cases. Scale bar, 50  $\mu$ m.

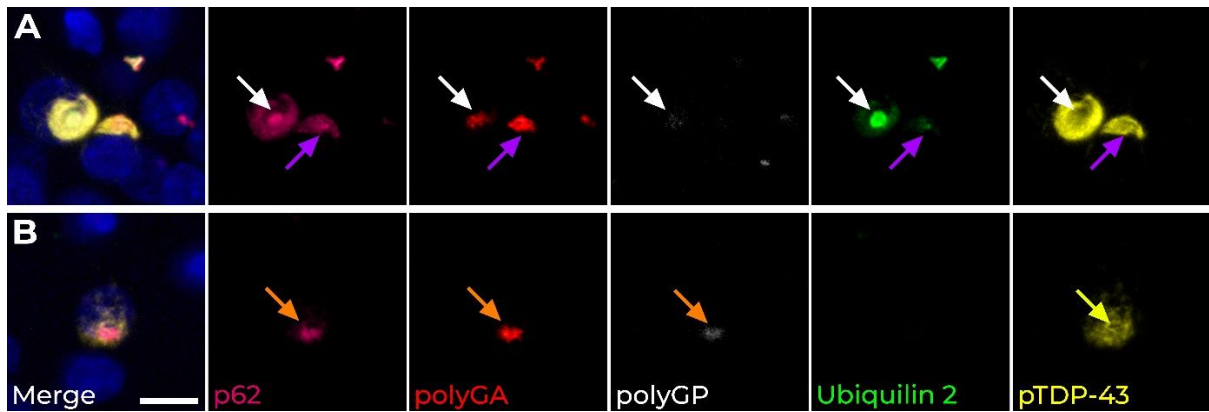

**Supplementary Figure 2 Hippocampal pTDP-43 rarely co-localises with p62-positive ubiquilin 2 and polyGA and/or polyGP in *C9orf72*-linked case MN28.** In the hippocampal granule cell layer, two types of aggregates were observed to be positive for pTDP-43; one was immunopositive for all markers (**A**, white arrows), while the other was immunopositive for p62, polyGA, and ubiquilin 2, and pTDP-43 without polyGP (**A**, purple arrows). Another rare form of dipeptide repeat aggregate was immunopositive for p62, polyGA and polyGP (**B**, orange arrows) with a pTDP-43 shell (**B**, yellow arrow). Scale bar, 10  $\mu$ m.

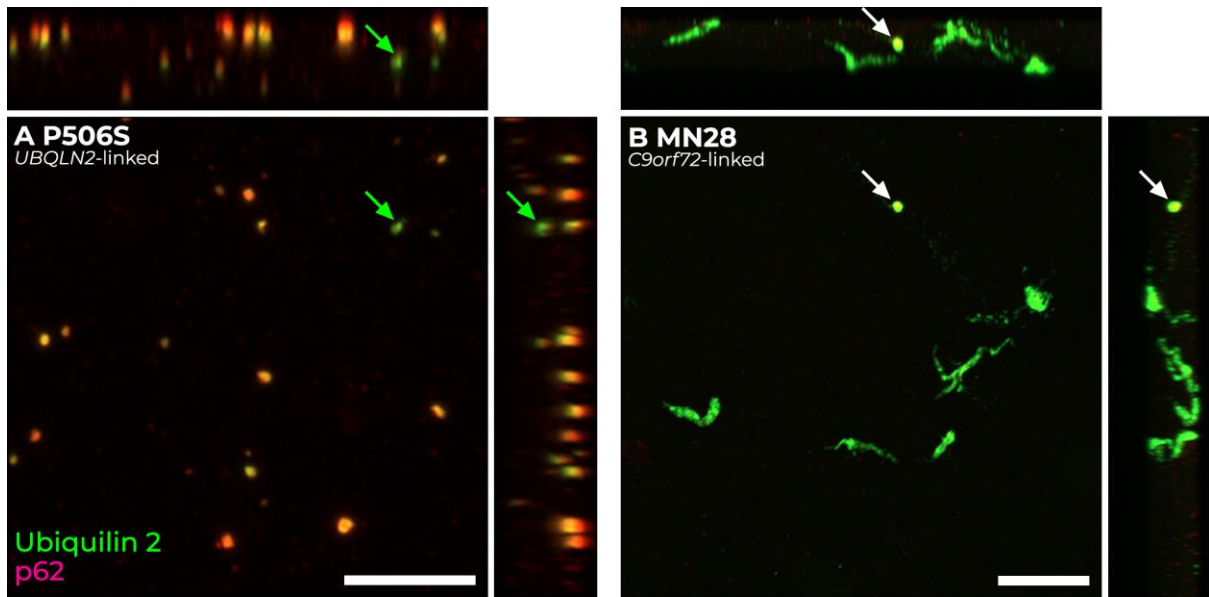

**Supplementary Figure 3 Mutant ubiquilin 2 was p62 positive in hippocampal molecular layer.** Maximum intensity Z-projections with orthogonal planes of the molecular layer confirmed that almost all mutant ubiquilin 2 aggregates in *UBQLN2*-linked ALS/FTD case p.P506S were compact and p62-labelled (**A**,  $z = 22.25 \mu\text{m}$ ) with very few ubiquilin 2 aggregates that were p62-negative (**A**, green arrow), while the majority of wildtype ubiquilin 2 in *C9orf72*-linked case MN28 were wispy and p62-negative (**B**,  $z = 13 \mu\text{m}$ ). A rare p62 co-labelled ubiquilin 2 aggregate is indicated with a white arrow in **B**. Scale bar,  $10 \mu\text{m}$ .

| Genetic classification              | Case          | Diagnosis             | Aggregate deposition |              |          |     |
|-------------------------------------|---------------|-----------------------|----------------------|--------------|----------|-----|
|                                     |               |                       | ML                   | CA - l-m/rad | CA - pyr | GCL |
| Control (n=5)                       |               | Neurologically normal |                      |              |          |     |
| Control (n=1)                       | H230          | Neurologically normal |                      |              |          |     |
| Familial ALS (n=5)                  |               |                       |                      |              |          |     |
| Sporadic ALS (n=10)                 |               |                       |                      |              |          |     |
| Sporadic ALS (n=4)                  |               |                       |                      |              |          |     |
| Sporadic ALS (n=6)                  | MN27          | MND-ALS/LBD           |                      |              |          |     |
|                                     | MN19          | MND-ALS               |                      |              |          |     |
|                                     | MN13          | MND-ALS               |                      |              |          |     |
|                                     | MN29          | MND-ALS               |                      |              |          |     |
|                                     | MN15          | MND-ALS/FTD           |                      |              |          |     |
|                                     | MN30          | MND-ALS               |                      |              |          |     |
| <i>C9orf72</i> -linked ALS (n=5)    | MN2           | MND-ALS               |                      |              |          |     |
|                                     | MN18          | MND-ALS               |                      |              |          |     |
|                                     | MN23          | MND-ALS               |                      |              |          |     |
|                                     | MN33          | MND-ALS               |                      |              |          |     |
|                                     | MN28          | MND-ALS               |                      |              |          |     |
| <i>UBQLN2</i> -linked VOUS (n=1)    | S222G         | PSP                   |                      |              |          |     |
| <i>UBQLN2</i> -linked ALS/FTD (n=7) | P497H         | MND-ALS               |                      |              |          |     |
|                                     | MN17 - T487I  | MND-ALS/FTD           |                      |              |          |     |
|                                     | V:7 - T487I   | MND-ALS/FTD           |                      |              |          |     |
|                                     | II:3 - P497L  | MND-ALS               |                      |              |          |     |
|                                     | III:3 - P497L | MND-ALS/FTD           |                      |              |          |     |
|                                     | IV:2 - P497L  | MND-ALS/FTD           |                      |              |          |     |
|                                     | P506S         | MND-ALS/FTD           |                      |              |          |     |

**Key** ML Molecular layer GCL Granular cell layer CA - l-m/rad Cornu ammonis lacunosum-molecular and radiatum layer CA - pyr Cornu ammonis pyramidal layer

pTDP-43 Ubiquilin 2 p62 polyGA polyGP Presence of pathology Absence of pathology Stage 4 ALS Protein signature

**LBD** Lewy body dementia **FTD** Frontotemporal dementia **PSP** Progressive supranuclear palsy **VOUS** Variant of uncertain significance

**Supplementary Figure 7 Combined pathological signatures discriminated between sporadic, *C9orf72*-linked, and *UBQLN2*-linked ALS/FTD.** Key shown within figure. P62 aggregates ('+' symbol on brown box) without other co-labelling were observed in CA – pyr and GCL cells in a subset of neurologically normal controls (n=1 of 6), unrelated familial ALS (n=5 of 5), and sporadic ALS cases (n=4 of 20). In contrast, pTDP-43 pathology (boxed '+' symbol on blue box) was present in these layers in a separate subset of sALS cases (n=6 of 20), co-localising with p62. Ubiquilin 2 pathology ('+' symbol on green box) was present in the hippocampus when ubiquilin 2 was wildtype (*C9orf72*-linked ALS) or mutant (*UBQLN2*-linked ALS/FTD). Wildtype ubiquilin 2 in *C9orf72*-linked ALS ML and CA – l-m/rad regions was p62-negative, and in the CA – pyr layer was associated with polyGA, polyGP, and p62 aggregates. PolyGA and polyGP aggregates were found in the GCL with or without ubiquilin 2, all colocalising with p62. CA – pyr cell and GCL aggregates had additional pTDP-43 pathology in only one case, and even then, only rarely. Mutant ubiquilin 2 aggregates in *UBQLN2*-linked ALS/FTD ML, and CA – l-m/rad regions were p62-positive and associated with GCL pTDP-43 aggregates only in some cases and either with or without ubiquilin 2 co-labelling. Blue outlines indicate unique aggregation features of *C9orf72*-linked ALS and *UBQLN2*-linked ALS/FTD hippocampal pathology. Abbreviations: CA – l-m/rad, cornu ammonis – lacunosum-molecular and radiatum layers; CA – pyr, cornu ammonis – pyramidal cells; GCL, granule cell layer.

## References for Supplementary materials

1. Williams KL, Warraich ST, Yang S, et al. UBQLN2/ubiquilin 2 mutation and pathology in familial amyotrophic lateral sclerosis. *Neurobiol Aging*. 2012;33(10):2527.e3-2527.e10. doi:10.1016/j.neurobiolaging.2012.05.008
2. Deng HXX, Chen W, Hong STT, et al. Mutations in UBQLN2 cause dominant X-linked juvenile and adult-onset ALS and ALS/dementia. *Nature*. 2011;477(7363):211-215. doi:10.1038/nature10353
3. Gkazi SA, Troakes C, Topp S, et al. Striking phenotypic variation in a family with the P506S UBQLN2 mutation including amyotrophic lateral sclerosis, spastic paraplegia, and frontotemporal dementia. *Neurobiol Aging*. 2019;73:229.e5-229.e9. doi:10.1016/j.neurobiolaging.2018.08.015
4. Fahed AC, McDonough B, Gouvion CM, et al. UBQLN2 mutation causing heterogeneous X-linked dominant neurodegeneration. *Ann Neurol*. 2014;75(5):793-798. doi:10.1002/ana.24164
5. Scotter EL, Smyth L, Bailey JWT, et al. C9ORF72 and UBQLN2 mutations are causes of amyotrophic lateral sclerosis in New Zealand: a genetic and pathologic study using banked human brain tissue. *Neurobiol Aging*. 2017;49:214.e1-214.e5. doi:10.1016/j.neurobiolaging.2016.06.019
